# Supplementary material
Source: MDPI journal article supplement (https://www.mdpi.com/2076-0760/13/1/70)
Supplement: s1 [file s1]

Table S1: Robustness-check of bivariate and multivariate results (total sample).

|                                    | Presenteeism propensity |                   |                    | Sickness presence days |                   |                   | Sickness absence days |                |                  | Sickness days |                  |                  |
|------------------------------------|-------------------------|-------------------|--------------------|------------------------|-------------------|-------------------|-----------------------|----------------|------------------|---------------|------------------|------------------|
|                                    | I                       | II                | III                | I                      | II                | III               | I                     | II             | III              | I             | II               | III              |
| Observed discrimination            | 0.24***                 | 0.31*<br>(.13)    | 0.36*<br>(0.14)    | 0.34***                | 0.20*<br>(0.09)   | 0.17*<br>(0.08)   | 0.08                  | 0.10<br>(0.10) | 0.01<br>(0.10)   | 0.29***       | 0.21**<br>(.08)  | 0.16*<br>(0.08)  |
| Experienced discrimination         | 0.29***                 | 1.68***<br>(0.39) | 1.35***<br>0(0.42) | 0.29***                | 0.82***<br>(0.21) | 0.82***<br>(0.22) | -0.02                 | 0.07<br>(0.28) | 0.30<br>(0.28)   | 0.19***       | 0.54**<br>(0.20) | 0.60**<br>(0.21) |
| sex (male)                         |                         |                   | -0.54<br>0(.29)    |                        |                   | 0.39<br>(0.27)    |                       |                | 0.22<br>(0.20)   |               |                  | 0.18<br>(0.21)   |
| age                                |                         |                   | 0.00<br>(0.01)     |                        |                   | -0.01<br>(0.01)   |                       |                | -0.02*<br>(0.01) |               |                  | -0.01<br>(0.01)  |
| job satisfaction                   |                         |                   | 0.02<br>(0.08)     |                        |                   | -0.06<br>(0.05)   |                       |                | -0.07<br>(0.06)  |               |                  | -.006<br>(0.05)  |
| Educational level                  |                         |                   |                    |                        |                   |                   |                       |                |                  |               |                  |                  |
| obligatory                         |                         |                   | -0.27<br>0(.40)    |                        |                   | -0.16<br>(0.20)   |                       |                | 0.67<br>(0.43)   |               |                  | 0.55<br>(0.40)   |
| apprenticeship / vocational school |                         |                   | 0.28<br>(0.19)     |                        |                   | 0.25<br>(0.14)    |                       |                | 0.19<br>(0.14)   |               |                  | 0.24*<br>(0.12)  |
| high school                        |                         |                   | 0.13<br>(0.20)     |                        |                   | -0.06<br>(0.05)   |                       |                | -0.05<br>(.014)  |               |                  | -0.04<br>(0.12)  |
| university                         |                         |                   | ref.               |                        |                   | ref               |                       |                | ref.             |               |                  | ref.             |
| n                                  | 297                     |                   |                    | 330                    |                   |                   | 333                   |                |                  | 324           |                  |                  |

I: Spearman's Rho; II: multivariate regression (binomial regression for presenteeism propensity; zero-inflated negative binomial regression for day-counts; unstandardized coefficients; SE in parentheses), III: multivariate regression adjusted for controls (binomial regression for presenteeism propensity; zero-inflated negative binomial regression for day-counts; unstandardized coefficients; SE in parentheses); \* p:  $\leq 0.05$ ; \*\* p:  $\leq 0.01$ ; \*\*\* p:  $\leq 0.001$ .

Table S2: Robustness-check of bivariate and multivariate results separated for childless respondents and respondents with children.

|                            | Presenteeism propensity |                   |                  | Sickness presence days |                  |                  | Sickness absence days |                 |                | Sickness days |                 |                  |
|----------------------------|-------------------------|-------------------|------------------|------------------------|------------------|------------------|-----------------------|-----------------|----------------|---------------|-----------------|------------------|
|                            | I                       | II                | III              | I                      | II               | III              | I                     | II              | III            | I             | II              | III              |
| with children              |                         |                   |                  |                        |                  |                  |                       |                 |                |               |                 |                  |
| Observed discrimination    | 0.28***                 | 0.39*<br>(0.20)   | 0.45*<br>(0.23)  | 0.37***                | 0.28*<br>(0.13)  | 0.25<br>(0.13)   | 0.07                  | 0.07<br>(0.16)  | 0.09<br>(0.15) | 0.31***       | 0.22<br>(0.12)  | 0.23<br>(0.12)   |
| Experienced discrimination | 0.28***                 | 1.44*<br>(0.70)   | 1.12<br>(0.74)   | 0.36***                | 0.90*<br>(0.39)  | 1.06**<br>(0.38) | 0.08                  | 0.72<br>(0.44)  | 0.75<br>(0.46) | 0.33***       | 0.92*<br>(0.36) | 0.95**<br>(0.36) |
| n                          | 142                     |                   |                  | 161                    |                  |                  | 164                   |                 |                | 158           |                 |                  |
| childless                  |                         |                   |                  |                        |                  |                  |                       |                 |                |               |                 |                  |
| Observed discrimination    | 0.19*                   | 0.27<br>(0.17)    | 0.27<br>(0.19)   | 0.30***                | 0.10<br>(0.12)   | 0.09<br>(0.10)   | 0.09                  | 0.06<br>(.14)   | 0.03<br>(0.12) | 0.26***       | 0.15<br>(0.10)  | 0.14<br>(0.09)   |
| Experienced discrimination | 0.27***                 | 1.66***<br>(0.49) | 1.37**<br>(0.52) | 0.24**                 | 0.76**<br>(0.27) | 0.71*<br>(0.27)  | -0.05                 | -0.09<br>0(.38) | 0.17<br>(0.35) | 0.13          | 0.39<br>(0.27)  | 0.46<br>(0.28)   |
| n                          | 155                     |                   |                  | 169                    |                  |                  | 169                   |                 |                | 166           |                 |                  |

I: Spearman's Rho; II: multivariate regression (binomial regression for presenteeism propensity; zero-inflated negative binomial regression for day-counts; unstandardized coefficients; SE in parentheses), III: multivariate regression adjusted for controls (binomial regression for presenteeism propensity; zero-inflated negative binomial regression for day-counts; unstandardized coefficients; SE in parentheses); \* p:  $\leq 0.05$ ; \*\* p:  $\leq 0.01$ ; \*\*\* p:  $\leq 0.001$ .
